# Supplementary material for: Itch suppression in mice and dogs by modulation of spinal α2 and α3GABAA receptors
Source: PubMed Central journal article supplement (PMC6089996; doi:10.1038/s41467-018-05709-0), 2018-08-13
Supplement: 41467_2018_5709_MOESM1_ESM.pdf [file 41467_2018_5709_MOESM1_ESM.pdf]

## Supplementary Information

### **Itch suppression in mice and dogs by selective modulation of spinal $\alpha 2$ and $\alpha 3$ GABA<sub>A</sub> receptors**

Ralvenius et al.

## Supplementary Figures

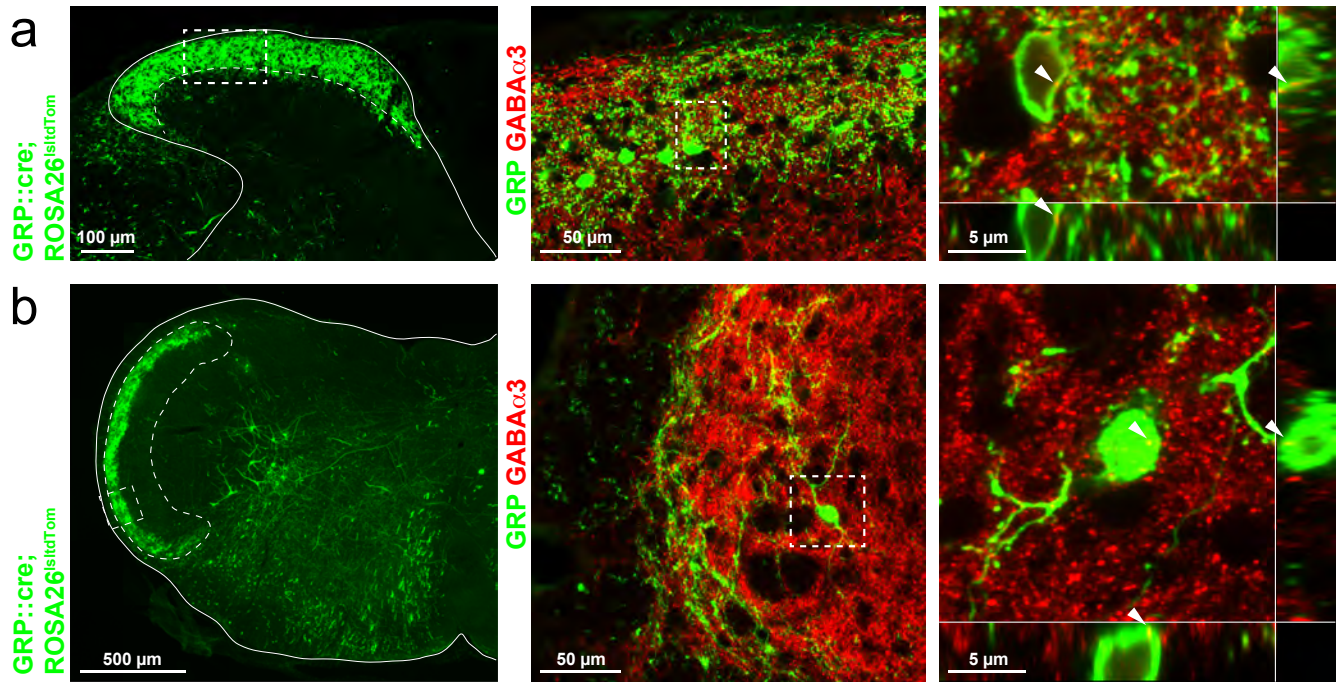

**Supplementary Figure 1.  $\alpha 3$ GABA<sub>A</sub>R expression in the mouse cervical spinal cord and medullary dorsal horn.**

Left: low magnification overviews illustrate the localization of GRP neurons in both structures. Dashed lines indicate the border between cervical lamina II and III (in a) and of the spinal trigeminal nucleus (in b). Dashed squares indicate areas displayed at high magnification in the middle panels. Middle: GRP positive cells (green) overlap with  $\alpha 3$ GABA<sub>A</sub>R immunoreactivity (red). Right: high magnification and orthogonal views indicate localization  $\alpha 3$ GABA<sub>A</sub>R on GRP expressing cells (see arrow heads). Similar results were obtained in three mice.

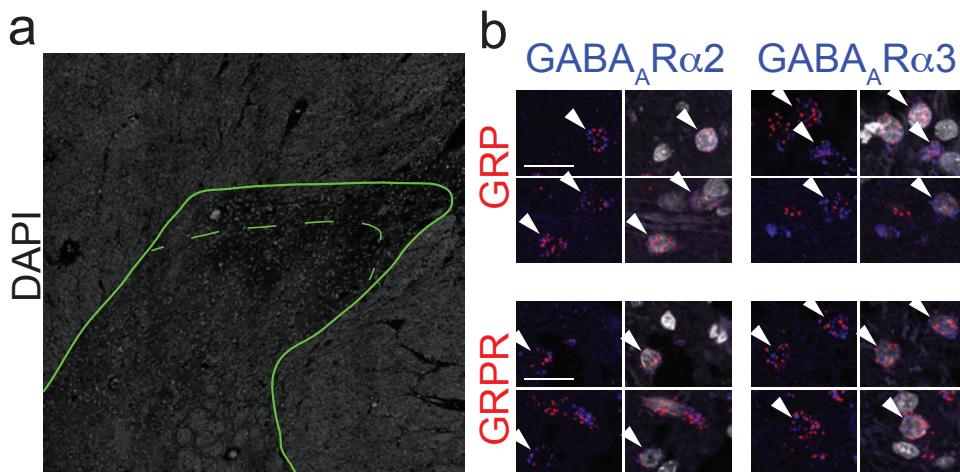

**Supplementary Figure 2. GABA<sub>A</sub>R  $\alpha 2$  and  $\alpha 3$  subunit transcripts in GRP and GRPR neurons of the human spinal cord.**

(a) Transverse section of the human cervical dorsal horn (grey matter border indicated in green). GRP and GRPR expressing neurons were found in the superficial dorsal horn. (b) Co-expression of GRP or GRPR (red dots) with  $\alpha 2$  or  $\alpha 3$ GABA<sub>A</sub>R subunits (blue). Arrows indicate cells co-expressing GRP or GRPR with  $\alpha 2$  or  $\alpha 3$ GABA<sub>A</sub>R subunits. DAPI positive nuclei are illustrated in white. Scale bars: 20  $\mu$ m.

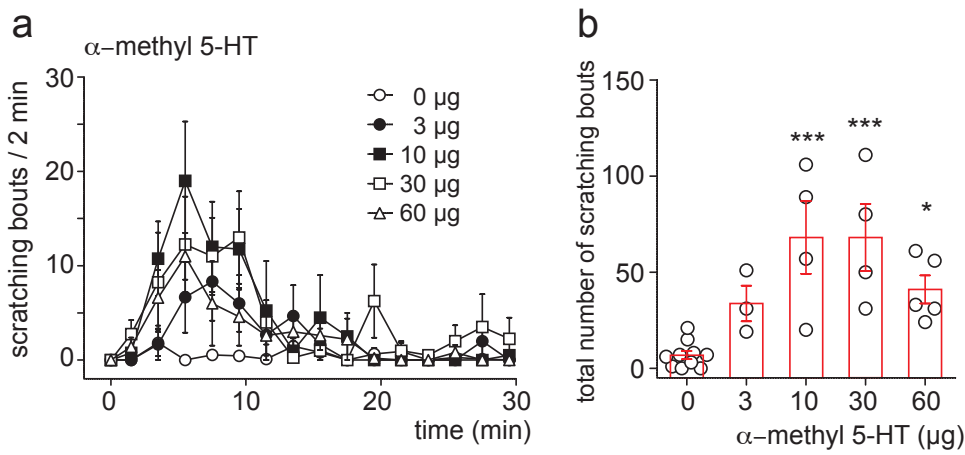

**Supplementary Figure 3. Dose finding for  $\alpha$ -methyl 5-HT in 129 SvJ mice.**

(a) Scratching responses in wild-type 129X1/SvJ evoked by the metabolically more stable serotonin analog  $\alpha$ -methyl 5-HT. Different doses of  $\alpha$ -methyl 5-HT were injected intracutaneously into the right cheek and scratching responses were counted for 30 min. Number of scratching bouts (mean  $\pm$  SEM) over time following injection of  $\alpha$ -methyl 5-HT. (b) Quantification and statistical analyses (ANOVA followed by Dunnett's post hoc test). Circles are values obtained from individual mice. Bars and error bars (red) are means and SEM.  $F(4,21) = 8.84$ ; \*,  $P < 0.05$ ; \*\*\*,  $P < 0.001$ ;  $n = 10, 3, 4, 4, \text{ and } 5$ , for 0, 3, 10, 30, and 60  $\mu$ g, respectively.

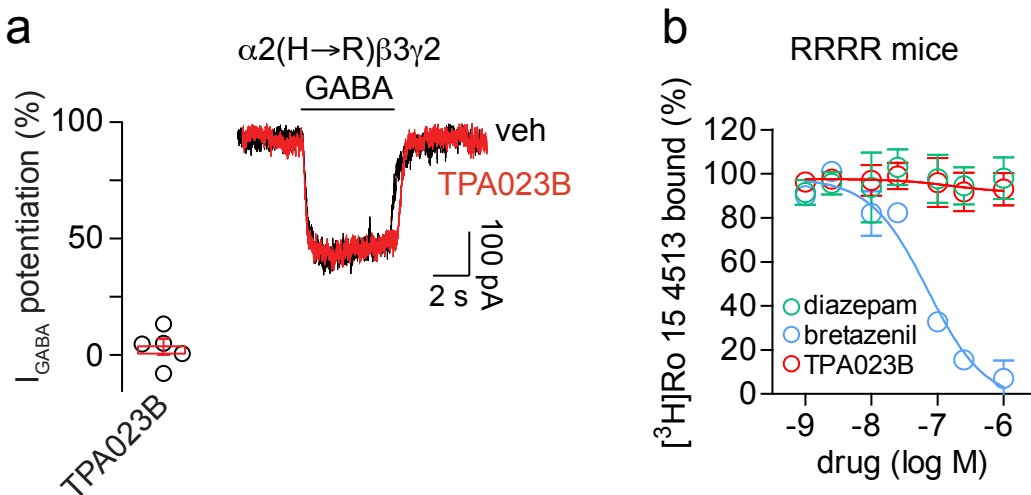

**Supplementary Figure 4. The H  $\rightarrow$  R point mutation in GABA<sub>A</sub>R  $\alpha$  subunits prevents modulation by and binding of TPA023B.**

(a) Positive allosteric modulation by TPA023B (1  $\mu$ M) of  $\alpha 2$ GABA<sub>A</sub>Rs in HEK 293 cells is abolished by the H  $\rightarrow$  R point mutation in the  $\alpha 2$  subunit ( $n = 5$ ). For data in wild-type GABA<sub>A</sub>Rs see figure 4a. (b) Accordingly, TPA023B failed to displace [ $^3$ H]Ro 15-4513 binding to brain membranes prepared from GABA<sub>A</sub>R quadruple point mutated (RRRR) mice. The same was confirmed for diazepam, which only binds to wild-type receptors. In contrast, bretazenil, which binds to both wild-type and  $\alpha(H \rightarrow R)$  point mutate receptors, dose-dependently inhibited [ $^3$ H]Ro 15-4513 binding.  $n$  (number of cells) = 4. Error bars indicate s.d. Error bars smaller than the symbol are not visible.

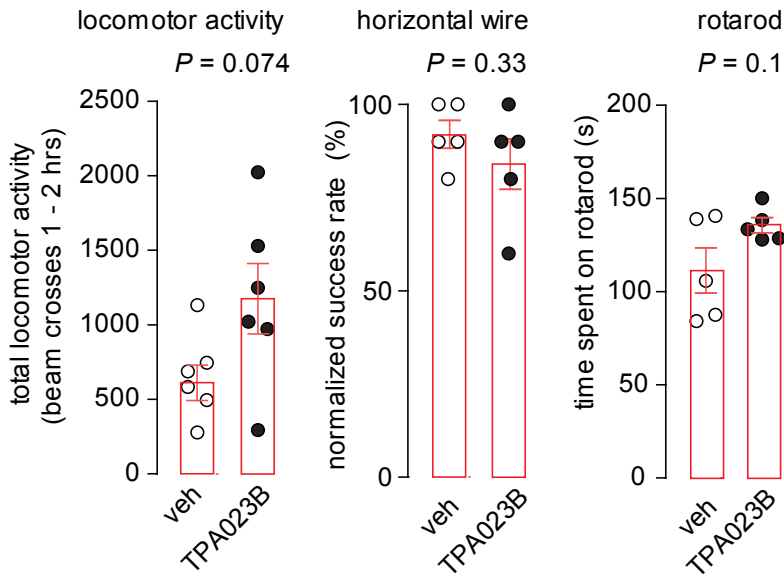

**Supplementary Figure 5. Behavioral effects of TPA023B (1 mg/kg, i.p.) in wild-type mice.**

Locomotor activity in the open field test. Statistical analysis of total number of beam crosses within the time interval 60 - 120 min ( $P = 0.074$ , unpaired t-test,  $n = 6$ ). Muscle relaxation in the horizontal wire test ( $P = 0.33$ , unpaired t-test,  $n = 5$ ). Motor coordination in the rotarod test (average time spent on the rotarod ( $P = 0.1$ , paired t-test,  $n = 5$ ). Error bars indicate s.e.m.

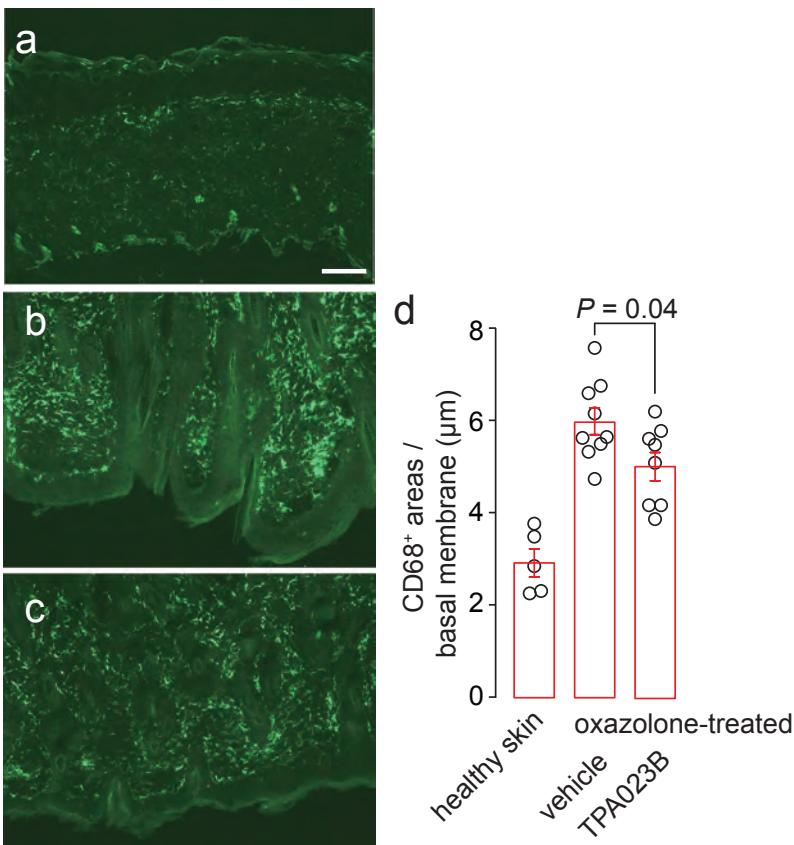

**Supplementary figure 6. Chronic treatment with TPA023B reduces macrophage infiltration.**

(a) Skin samples from healthy mice (a), and atopic-like (oxazolone-treated) mice treated for nine days either with vehicle (b) or TPA023B (1 mg/kg, i.p.) (c). Skin samples were taken from the mice used for the experiments shown in figure 5. Infiltrating macrophages were visualized with an antiserum against CD68. Scale bar, 100  $\mu\text{m}$ . (d) Quantification. Statistical comparison was performed between vehicle and TPA023B treated atopic mice. Macrophage infiltration in healthy mice (left column,  $n = 5$ ) is shown for comparison.  $P = 0.04$ , unpaired t-test,  $n = 9$  and 8, for vehicle and TPA023B, respectively.

## Supplementary Tables

| Gene symbol   | Mouse Marker Name                           | Chromo-some | Fraction marker positive cells sensory neuron population |                 |             |
|---------------|---------------------------------------------|-------------|----------------------------------------------------------|-----------------|-------------|
|               |                                             |             | NP1<br>=MrgprD                                           | NP2<br>=MrgprA3 | NP3<br>=BNP |
| <i>Gabra1</i> | GABA <sub>A</sub> receptor, subunit alpha 1 | 11          | 0.224                                                    | 0.0625          | 0           |
| <i>Gabra2</i> | GABA <sub>A</sub> receptor, subunit alpha 2 | 5           | 0.08                                                     | 0.0938          | 0           |
| <i>Gabra3</i> | GABA <sub>A</sub> receptor, subunit alpha 3 | X           | 0                                                        | 0.0313          | 0           |
| <i>Gabra4</i> | GABA <sub>A</sub> receptor, subunit alpha 4 | 5           | 0                                                        | 0               | 0           |
| <i>Gabra5</i> | GABA <sub>A</sub> receptor, subunit alpha 5 | 7           | 0.016                                                    | 0               | 0           |
| <i>Gabra6</i> | GABA <sub>A</sub> receptor, subunit alpha 6 | 11          | 0                                                        | 0               | 0           |

**Supplementary Table 1. GABA<sub>A</sub>R  $\alpha$  subunit expression in three populations of primary pruritoceptive neurons.** Data extracted from Supplementary Reference <sup>1</sup>. The NP1, NP2 and NP3 populations are largely identical with the MrgprD, MrgprA3 and BNP positive subpopulations, respectively.

### Scratching bouts (number/hour)

|                      | dog 1       | dog 2       | dog 3       | dog 4       | dog 5       | dog 6       | dog 7       | dog 8       | dog 9       |                 |
|----------------------|-------------|-------------|-------------|-------------|-------------|-------------|-------------|-------------|-------------|-----------------|
| Chip                 | "4154"      | "0428"      | "8959"      | "5543"      | "0788"      | "1177"      | "0483"      | "2584"      | "4721"      |                 |
| sex                  | male        | male        | male        | male        | male        | male        | female      | female      | female      |                 |
| weight (kg)          | 13.0        | 12.0        | 12.0        | 13.0        | 11.0        | 12.5        | 9.0         | 10.5        | 13.0        |                 |
| round 1: day 2       | 8.3         | 1.8         | 1.5         | 5.0         | 4.3         | 6.7         | 6.5         | 7.0         | 7.3         |                 |
| day 3                | 7.0         | 3.5         | 2.3         | <b>2.8</b>  | 7.0         | 7.8         | <b>2.8</b>  | <b>2.2</b>  | 6.5         |                 |
| round 2: day 2       | 5.3         | 2.5         | 3.5         | 8.2         | 7.8         | 6.0         | 3.2         | 5.8         | 11.0        |                 |
| day 3                | <b>4.2</b>  | <b>1.5</b>  | <b>2.5</b>  | 8.8         | <b>3.2</b>  | <b>5.2</b>  | 7.3         | 7.8         | <b>5.0</b>  |                 |
| normalized data:     |             |             |             |             |             |             |             |             |             |                 |
| round 1: day 3/day 2 | 0.84        | 1.91        | 1.56        | <b>0.57</b> | 1.62        | 1.18        | <b>0.44</b> | <b>0.31</b> | 0.89        |                 |
| round 2: day 3/day 2 | <b>0.78</b> | <b>0.60</b> | <b>0.71</b> | 1.08        | <b>0.40</b> | <b>0.86</b> | 2.32        | 1.34        | <b>0.45</b> |                 |
|                      |             |             |             |             |             |             |             |             |             | mean $\pm$ sem  |
| placebo              | 0.84        | 1.91        | 1.56        | 1.08        | 1.62        | 1.18        | 2.32        | 1.34        | 0.89        | 1.41 $\pm$ 0.16 |
| TPA023B              | 0.78        | 0.60        | 0.71        | 0.57        | 0.40        | 0.86        | 0.44        | 0.31        | 0.45        | 0.57 $\pm$ 0.06 |
| % reduction          | 7.0         | 68.6        | 54.1        | 47.6        | 75.0        | 26.7        | 81.2        | 77.0        | 48.7        | 54 $\pm$ 8.3    |

### Time spent scratching (min/hour)

|                      | dog 1       | dog 2       | dog 3       | dog 4       | dog 5       | dog 6       | dog 7       | dog 8       | dog 9       |                 |
|----------------------|-------------|-------------|-------------|-------------|-------------|-------------|-------------|-------------|-------------|-----------------|
| round 1: day 2       | 89.0        | 9.8         | 4.8         | 30.2        | 30.3        | 69.5        | 22.5        | 19.0        | 36.2        |                 |
| day 3                | 76.5        | 24.5        | 9.7         | <b>21.8</b> | 93.2        | 84.8        | <b>4.7</b>  | <b>0.2</b>  | 27.8        |                 |
| round 2: day 2       | 70.7        | 13.5        | 21.2        | 94.3        | 155.5       | 79.8        | 19.0        | 38.0        | 137.7       |                 |
| day 3                | <b>32.7</b> | <b>9.7</b>  | <b>23.5</b> | 86.5        | <b>50.2</b> | <b>65.3</b> | 35.8        | 15.8        | <b>62.2</b> |                 |
| normalized data:     |             |             |             |             |             |             |             |             |             |                 |
| round 1: day 3/day 2 | 0.86        | 2.49        | 2.00        | <b>0.72</b> | 3.07        | 1.22        | <b>0.21</b> | <b>0.01</b> | 0.77        |                 |
| round 2: day 3/day 2 | <b>0.46</b> | <b>0.72</b> | <b>1.11</b> | 0.92        | <b>0.32</b> | <b>0.82</b> | 1.89        | 0.42        | <b>0.45</b> |                 |
|                      |             |             |             |             |             |             |             |             |             | mean $\pm$ sem  |
| placebo              | 0.86        | 2.49        | 2.00        | 0.92        | 3.07        | 1.22        | 1.89        | 0.42        | 0.77        | 1.51 $\pm$ 0.30 |
| TPA023B              | 0.46        | 0.72        | 1.11        | 0.72        | 0.32        | 0.82        | 0.21        | 0.01        | 0.45        | 0.54 $\pm$ 0.11 |
| % reduction          | 46.2        | 71.3        | 44.5        | 21.1        | 89.5        | 33.0        | 89.0        | 97.9        | 41.3        | 59 $\pm$ 9.4    |

**Supplementary Table 2. Antipruritic responses to TPA023B in individual dogs.**

Bold numbers are values obtained following treatment with TPA023B (20 mg, p.o.)

| Mouse line                                                  | Forward primer                                     | Reverse primer                                                                  |
|-------------------------------------------------------------|----------------------------------------------------|---------------------------------------------------------------------------------|
| $\alpha 1(H \rightarrow R)$<br>Gabra1 <sup>tm1.1Uru</sup>   | UR12: CAA TGG TAG GCT CAC TCT GGG AGA TGA TA       | UR 70: AAC ACA CAC TGG CAG GAC TGG CTA GG                                       |
| $\alpha 2(H \rightarrow R)$<br>Gabra2 <sup>tm1.1Uru</sup>   | KL25: GCA TGC ACC ACC CAG GAA GCG ATT              | KL5: 5TCC ATC ATC CTG GAT TCG AAG CAG C                                         |
| $\alpha 3(H \rightarrow R)$<br>Gabra3 <sup>tm1Uru</sup>     | UR75: GAC AGA CAT GGC ATG ATG AAA GAC TGA AAT      | UR106: ACA AAA TGT AAG AAC AAG AAC CAA GAA AAT                                  |
| $\alpha 5(H \rightarrow R)$<br>Gabra3 <sup>tm2Uru</sup>     | RK4: TTA AAC CGC AGC CTT TCA TCT TTC               | RK5: GAG GCC ACC TAA TGC TTC CAG CTT                                            |
| $\alpha 2^{\text{floxed}}$<br>Gabra2 <sup>tm2.1Uru</sup>    | R24: GTC CTA TCC CTT CGT CCT CAC C                 | R23: TAT CTT GTC TTT CCC CTC CTG GTT G                                          |
| $\alpha 3^{-/-}$<br>Gabra3 <sup>tm2Uru</sup>                | UR75: GAC AGA CAT GGC ATG ATG AAA GAC TGA AAT      | UR106: ACA AAA TGT AAG AAC AAG AAC CAA GAA AAT                                  |
| sns-cre<br>Tg(Scn10a-cre)1Rkun                              | Cre A: GCA TGA TCT CCG GTA TTG AAA CTC C           | CreS: TGA CAG CAA TGC TGT TTC ACT GG                                            |
| hoxB8-cre<br>Tg(Hoxb8-cre)1403Uze                           | o649 HoxB8_s: GCC TCA AAA TTC AAT AAA ACG CCA CC   | o235 CreA: GCA TGA TCT CCG GTA TTG AAA CTC C                                    |
| mrgprA3::cre<br>Tg(Mrgpra3-GFP/cre)#Xzd                     | BACA3-F789: TAT CAT GGC CGA CAA GCA GAA            | BACA3-R1287: CCG GTT ATT CAA CTT GCA CCA T                                      |
| GRP::eGFP<br>Tg(Grp-EGFP)DV197Gsat/Mmucd                    | Grp (10444) F1: GGG ACA ACG CAC TCT CAG CCT A      | GFP R2: TAG CGG CTG AAG CAC TGC A                                               |
| GRPR::eGFP<br>Tg(Grpr-EGFP)PZ62Gsat/Mmucd                   | Grpr (36178) F1: GAT CAG CGA GCC TAA CTG ACA AAC C | GFP R3: GGT CGG GGT AGC GGC TGA A                                               |
| GRP::cre<br>Tg(Grp-cre)KH288Gsat/Mmucd                      | Grp F: GGG ACA ACG CAC TCT CAG CCT A               | CreGS R1: Cgg CAA ACg gAC AgA AgC ATT                                           |
| ROSA26 <sup>Isl-TVA</sup><br>Gt(ROSA)26Sor<tm1(Tva)Dsa      | R26-Tva-UP: AAAGTCGCTCTGAGTTGTTAT                  | R26-Tva-SA-mut-LP: GCGAAGAGTTTGTCTCAACC<br>R26-Tva-WT-LP: GGAGCGGGAGAAATGGATATG |
| ROSA26 <sup>Isl-tdTomato</sup><br>tm66.1(CAG-tdTomato)Hze/J | oIMR9105: CTG TTC CTG TAC GGC ATG G                | oIMR9103: GGC ATT AAA GCA GCG TAT CC                                            |

**Supplementary Table 3. Mutant mouse strains and PCR primers for genotyping.**

## Supplementary References:

1. Usoskin, D., *et al.* Unbiased classification of sensory neuron types by large-scale single-cell RNA sequencing. *Nat Neurosci* **18**, 145-153 (2015).
